# Supplementary material for: Rate of Memory Change Before and After Cancer Diagnosis
Source: PubMed Central journal article supplement (PMC6593639; doi:10.1001/jamanetworkopen.2019.6160), 2019-06-21
Supplement: jamanetwopen-2-e196160-s001.pdf [file jamanetwopen-2-e196160-s001.pdf]

## Supplementary Online Content

Ospina-Romero M, Abdiwahab E, Kobayashi L, et al. Rate of memory change before and after cancer diagnosis. *JAMA Netw Open*. 2019;2(6):e196160. doi:10.1001/jamanetworkopen.2019.6160

**eAppendix 1.** List of Health and Retirement Study Datasets Used for This Study

**eTable 1.** Comparison of Health and Retirement Study Participants With and Without Complete Baseline Data

**eFigure.** LOWESS Curves of the Observed Memory Scores in Participants From the Health and Retirement Study

**eTable 2.** Coefficients of the Fully Adjusted Model of Memory

**eTable 3.** Coefficients of the Fully Adjusted Model of Memory With Interactions of Baseline Covariates and Age

**eTable 4.** Estimated Regression Coefficients of Memory Function and Memory Decline Restricting the Sample to Those Who Had at Least 3, 4, or 5 Follow-up Waves

**eAppendix 2.** Estimation of Risk Ratio for Memory Impairment Between Participants With Cancer Diagnosis (2 Years After Cancer) and Similar Aged Participants With No Cancer Diagnosis During Follow-up

This supplementary material has been provided by the authors to give readers additional information about their work.

## **eAppendix 1. List of Health and Retirement Study Datasets Used for This Study**

1. RAND HRS Data Documentation. Version P
2. Tracker file HRS. Version 2014
3. HRS core dataset from 2000 to 2014 (for year and month of cancer diagnosis)
4. Imputations of memory score dataset (Wu et al. 2013)
5. Childhood socioeconomic measures dataset (Vable et al. 2017)
6. HRS core dataset 1998 (for childhood self-rated health)

**eTable 1. Comparison of Health and Retirement Study participants with and without complete baseline data.** Participants with missing baseline data were mainly from Hispanic origin with low educational level.

| Characteristic          | Complete |        | Missing |        |
|-------------------------|----------|--------|---------|--------|
|                         | n        | (%)    | n       | (%)    |
| Total                   | 16,223   | (87.7) | 2,270   | (12.3) |
| Age, mean (SD), years   | 66.4     | (10.4) | 64.7    | (10.4) |
| Male                    | 6,924    | (42.7) | 1,006   | (44.3) |
| Race                    |          |        |         |        |
| White                   | 13,409   | (82.6) | 1,729   | (76.2) |
| Black                   | 2,470    | (15.2) | 224     | (9.9)  |
| Other                   | 344      | (2.1)  | 311     | (13.7) |
| Hispanic                | 32       | (0.2)  | 1,437   | (63.4) |
| Education               |          |        |         |        |
| Less than high school   | 4,159    | (25.6) | 1,238   | (54.5) |
| High school             | 8,643    | (53.3) | 778     | (34.3) |
| Some/complete college   | 2,186    | (13.5) | 176     | (7.8)  |
| Master or higher degree | 1,235    | (7.6)  | 78      | (3.4)  |

**eFigure. LOWESS Curves of the Observed Memory Scores in Participants From the Health and Retirement Study.** A. The trajectories of memory function in the cancer group before the diagnosis and the comparison group are diverging at older ages. B. The trajectories of memory function in the cancer group after the diagnosis and the comparison group are diverging at older ages. Bandwidth = 0.2.

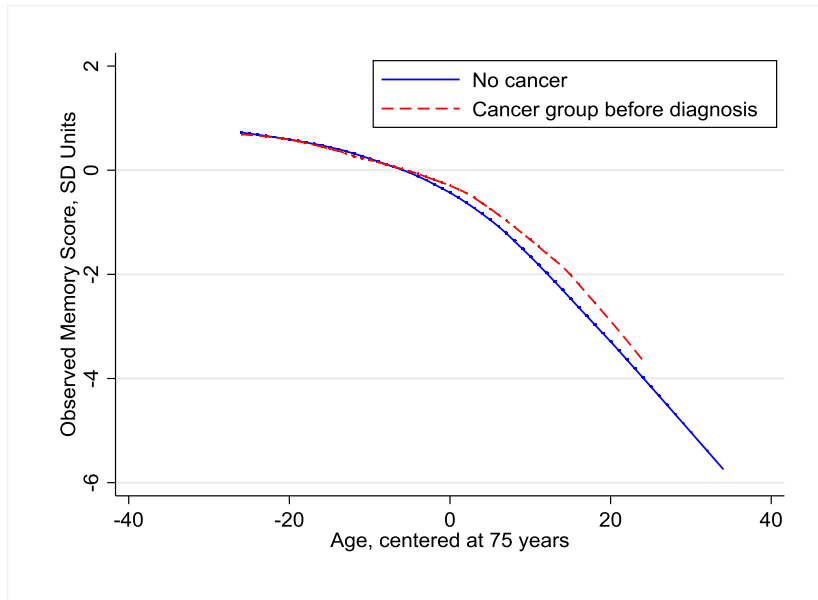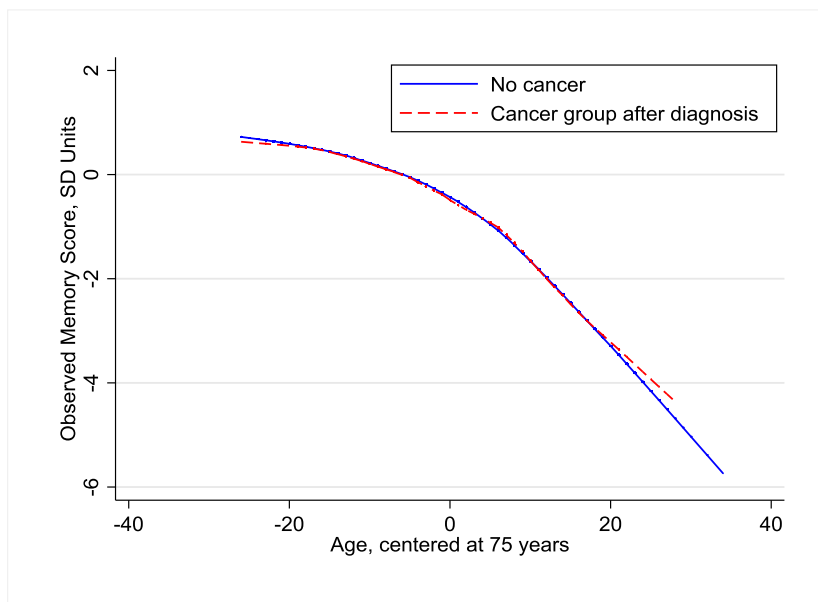

| <b>eTable 2. Coefficients of the Fully Adjusted Model of Memory</b>                                             |           |         |                    |         |
|-----------------------------------------------------------------------------------------------------------------|-----------|---------|--------------------|---------|
| Characteristic                                                                                                  |           | $\beta$ | 95% CI             | P       |
| Average memory score at age 75 (constant term)                                                                  |           | -0.251  | (-0.269, -0.233)   | < 0.001 |
| Difference in memory score right before cancer                                                                  |           | 0.096   | (0.060, 0.1312)    | < 0.001 |
| Change in memory at the time of diagnosis                                                                       |           | -0.058  | (-0.084, -0.032)   | < 0.001 |
| <i>Participants who remained cancer-free</i>                                                                    |           |         |                    |         |
| Memory slope with linear age (years)                                                                            |           | -0.110  | (-0.111, -0.110)   | < 0.001 |
| Memory slope with quadratic age (years <sup>2</sup> )                                                           |           | -0.003  | (-0.0031, -0.0030) | < 0.001 |
| <i>Difference in rate of change for people diagnosed with cancer compared to those who remained cancer-free</i> |           |         |                    |         |
| Pre-cancer memory slope (linear, years)                                                                         |           | 0.008   | (0.005, 0.012)     | < 0.001 |
| Post-cancer memory slope (linear, years)                                                                        |           | 0.005   | (0.001, 0.010)     | 0.012   |
| <i>Covariates</i>                                                                                               |           |         |                    |         |
| Male gender                                                                                                     |           | -0.343  | ( -0.355, -0.332)  | < 0.001 |
| Nonwhite race                                                                                                   |           | -0.651  | (-0.666, -0.635)   | < 0.001 |
| Years of education (center at 12 years)                                                                         |           | 0.032   | (0.030, 0.034)     | < 0.001 |
| Southern birth place                                                                                            |           | -0.067  | (-0.079, -0.050)   | < 0.001 |
| Childhood self-rated health (reference: very good/excellent)                                                    | Good      | -0.025  | (-0.040, -0.010)   | 0.001   |
|                                                                                                                 | Poor/Fair | -0.027  | (-0.051, -0.003)   | 0.024   |
| Childhood SES score                                                                                             |           | -0.008  | (-0.014, -0.002)   | 0.013   |
| Total household wealth (per 100,000)                                                                            |           | -0.332  | (-0.792, 0.127)    | 0.156   |
| Current tobacco use                                                                                             |           | -0.008  | (-0.022, 0.006)    | 0.267   |
| Current alcohol use (reference: none)                                                                           | Low risk  | 0.007   | (-0.006, 0.019)    | 0.301   |
|                                                                                                                 | Binge     | -0.027  | (-0.061, 0.008)    | 0.131   |
| Vigorous physical activity                                                                                      |           | 0.023   | (0.012, 0.034)     | < 0.001 |
| Body Mass Index                                                                                                 |           | 0.002   | (0.001, 0.003)     | 0.001   |
| <i>Comorbidities</i>                                                                                            |           |         |                    |         |
| Hypertension                                                                                                    |           | -0.020  | (-0.032, -0.008)   | 0.001   |
| Diabetes mellitus                                                                                               |           | -0.039  | (-0.058, -0.020)   | < 0.001 |
| Lung Disease                                                                                                    |           | -0.001  | (-0.028, 0.025)    | 0.920   |
| Heart Disease                                                                                                   |           | -0.009  | (-0.026, 0.009)    | 0.328   |
| Stroke                                                                                                          |           | -0.063  | (-0.093, -0.032)   | < 0.001 |
| Arthritis                                                                                                       |           | -0.010  | (-0.021, 0.002)    | 0.097   |

| <b>eTable 3. Coefficients of the Fully Adjusted Model of Memory With Interactions of Baseline Covariates and Age</b> |          |         |                    |         |
|----------------------------------------------------------------------------------------------------------------------|----------|---------|--------------------|---------|
| Characteristic                                                                                                       |          | $\beta$ | 95% CI             | P       |
| Average memory score at age 75 (constant term)                                                                       |          | -0.193  | (-0.221, -0.165)   | < 0.001 |
| Difference in memory score right before cancer                                                                       |          | 0.084   | (0.048, 0.120)     | < 0.001 |
| Change in memory at the time of diagnosis                                                                            |          | -0.056  | (-0.081, -0.030)   | < 0.001 |
| Participants who remained cancer-free                                                                                |          |         |                    |         |
| Memory slope with linear age (years)                                                                                 |          | -0.105  | (-0.107, -0.103)   | < 0.001 |
| Memory slope with quadratic age (years <sup>2</sup> )                                                                |          | -0.003  | (-0.0030, -0.0029) | < 0.001 |
| Difference for people diagnosed with cancer                                                                          |          |         |                    |         |
| Pre-cancer memory slope (linear, years)                                                                              |          | 0.008   | (0.004, 0.011)     | < 0.001 |
| Post-cancer memory slope (linear, years)                                                                             |          | 0.004   | (-0.031, 0.080)    | 0.069   |
| Covariates                                                                                                           |          |         |                    |         |
| Male gender                                                                                                          |          | -0.398  | (-0.421, -0.374)   | < 0.001 |
| Nonwhite race                                                                                                        |          | -0.768  | (-0.801, -0.735)   | < 0.001 |
| Years of education (center at 12 years)                                                                              |          | 0.056   | (0.051, 0.060)     | < 0.001 |
| Southern birth place                                                                                                 |          | -0.136  | (-0.161, -0.110)   | < 0.001 |
| Childhood self-rated health (reference: high)                                                                        | Good     | -0.047  | (-0.076, -0.018)   | 0.002   |
|                                                                                                                      | Low      | -0.043  | (-0.091, 0.004)    | 0.072   |
| Childhood SES score                                                                                                  |          | -0.012  | (-0.026, 0.003)    | 0.115   |
| Total household wealth (per 100,000)                                                                                 |          | 2.920   | (1.42, 4.43)       | < 0.001 |
| Current tobacco use                                                                                                  |          | -0.119  | (-0.151, -0.086)   | < 0.001 |
| Current alcohol use (reference: none)                                                                                | Low risk | 0.005   | (0.003, 0.007)     | < 0.001 |
|                                                                                                                      | Binge    | -0.011  | (-0.017, -0.005)   | < 0.001 |
| Vigorous physical activity                                                                                           |          | 0.071   | (0.048, 0.094)     | < 0.001 |
| Body Mass Index                                                                                                      |          | 0.000   | (-0.002, 0.003)    | 0.710   |
| Comorbidities                                                                                                        |          |         |                    |         |
| Hypertension                                                                                                         |          | -0.020  | (-0.043, 0.004)    | 0.103   |
| Diabetes mellitus                                                                                                    |          | -0.151  | (-0.188, -0.115)   | < 0.001 |
| Lung Disease                                                                                                         |          | -0.010  | (-0.058, 0.037)    | 0.669   |
| Heart Disease                                                                                                        |          | -0.005  | (-0.034, 0.024)    | 0.754   |
| Stroke                                                                                                               |          | -0.203  | (-0.250, -0.156)   | < 0.001 |
| Arthritis                                                                                                            |          | 0.012   | (-0.011, 0.035)    | 0.300   |
| Interactions                                                                                                         |          |         |                    |         |
| Education*age                                                                                                        |          | 0.0023  | (0.002, 0.003)     | < 0.001 |
| Nonwhite*age                                                                                                         |          | -0.0099 | (-0.012, -0.007)   | < 0.001 |
| Male*age                                                                                                             |          | -0.0053 | (-0.007, -0.004)   | < 0.001 |
| SUS*age                                                                                                              |          | -0.0057 | (-0.007, -0.004)   | < 0.001 |
| Childhood SES*age                                                                                                    |          | -0.0005 | (-0.001, 0.000)    | 0.295   |
| Total household wealth*age                                                                                           |          | 0.2390  | (0.134, 0.344)     | < 0.001 |
| Childhood health*age                                                                                                 | good     | -0.0018 | (-0.004, 0.000)    | 0.09    |
|                                                                                                                      | low      | -0.0013 | (-0.005, 0.002)    | 0.442   |

|                       |          |         |                   |        |
|-----------------------|----------|---------|-------------------|--------|
| Smoking*age           |          | -0.0079 | (-0.010, -0.006)  | <0.001 |
| Alcohol*age           | low risk | 0.0053  | (0.003, 0.007)    | <0.001 |
|                       | Binge    | -0.0112 | (-0.017, -0.005)  | <0.001 |
| Physical activity*age |          | 0.0042  | (0.003, 0.006)    | <0.001 |
| BMI*age               |          | -0.0001 | (-0.0002, 0.0001) | 0.503  |
| HTN*age               |          | 0.0004  | (-0.001, 0.002)   | 0.614  |
| Diabetes*age          |          | -0.0096 | (-0.012, -0.007)  | <0.001 |
| Lung Disease*age      |          | -0.0011 | (-0.005, 0.002)   | 0.54   |
| Heart Disease*age     |          | 0.0003  | (-0.002, 0.002)   | 0.758  |
| Stroke*age            |          | -0.0142 | (-0.018, -0.011)  | <0.001 |
| Arthritis*age         |          | 0.0019  | (0.00028, 0.0035) | 0.021  |

**eTable 4. Estimated Regression Coefficients of Memory Function and Memory Decline Restricting the Sample to Those Who Had at Least 3, 4, or 5 Follow-up Waves**

|                                                                     |                                                | Model 3 <sup>a</sup> |                  | Model 4 <sup>b</sup> |                  | Model 5 <sup>c</sup> |                  |
|---------------------------------------------------------------------|------------------------------------------------|----------------------|------------------|----------------------|------------------|----------------------|------------------|
| Characteristic                                                      |                                                | $\beta$              | 95% CI           | $\beta$              | 95% CI           | $\beta$              | 95% CI           |
| <b>Memory function</b>                                              |                                                |                      |                  |                      |                  |                      |                  |
|                                                                     | Average memory score at age 75 (constant term) | -0.221               | (-0.239, -0.203) | -0.199               | (-0.217, -0.181) | -0.169               | (-0.187, -0.150) |
|                                                                     | Difference in memory score right before cancer | 0.075                | (0.039, 0.112)   | 0.062                | (0.026, 0.098)   | 0.048                | (0.012, 0.084)   |
|                                                                     | Change in memory at the time of diagnosis      | -0.050               | (-0.076, -0.024) | -0.038               | (-0.065, -0.012) | -0.031               | (-0.058, -0.045) |
| <b>Memory decline per decade</b>                                    |                                                |                      |                  |                      |                  |                      |                  |
| <b>Among participants not diagnosed with cancer</b>                 |                                                |                      |                  |                      |                  |                      |                  |
|                                                                     | Memory slope with linear age                   | -1.088               | (-1.099, -1.076) | -1.074               | (-1.086, -1.063) | -1.058               | (-1.070, -1.046) |
|                                                                     | Memory slope with quadratic age                | -0.303               | (-0.307, -0.297) | -0.302               | (-0.307, -0.297) | -0.303               | (-0.308, -0.298) |
| <b>Difference for people diagnosed with cancer</b>                  |                                                |                      |                  |                      |                  |                      |                  |
|                                                                     | Pre-cancer memory slope (linear)               | 0.066                | (0.031, 0.102)   | 0.055                | (0.019, 0.090)   | 0.044                | (0.009, 0.080)   |
|                                                                     | Post-cancer memory slope (linear)              | 0.037                | (-0.006, 0.079)  | 0.021                | (-0.021, 0.063)  | 0.005                | (-0.037, 0.046)  |
| a. Included participants with 3 or more follow-up waves, n = 13,044 |                                                |                      |                  |                      |                  |                      |                  |
| b. Included participants with 4 or more follow-up waves, n = 11,829 |                                                |                      |                  |                      |                  |                      |                  |
| c. Included participants with 5 or more follow-up waves, n = 10,730 |                                                |                      |                  |                      |                  |                      |                  |



**eAppendix 2.** Estimation of risk ratio for memory impairment between participants with cancer diagnosis (2 years after cancer) and similar aged participants with no cancer diagnosis during follow-up.

The mean memory function 2 years after cancer, when cancer diagnosis was at 75 years of age, is -0.43 units (95% CI: 0.47, 0.40). The mean memory function at 77 years of age in the group with no cancer diagnosis is -0.48 units (95% CI: 0.50, 0.46). The averaged difference in memory function 2 years after diagnosis was 0.049 units (95% CI: 0.012, 0.086).

If we assume that the risk of memory impairment in the population with no cancer diagnosis is 10%, we can find the cutoff level when memory becomes impaired (threshold for memory impairment). The z-score that cuts the lower 10% of the population with no cancer is -1.28. (see Figure below).

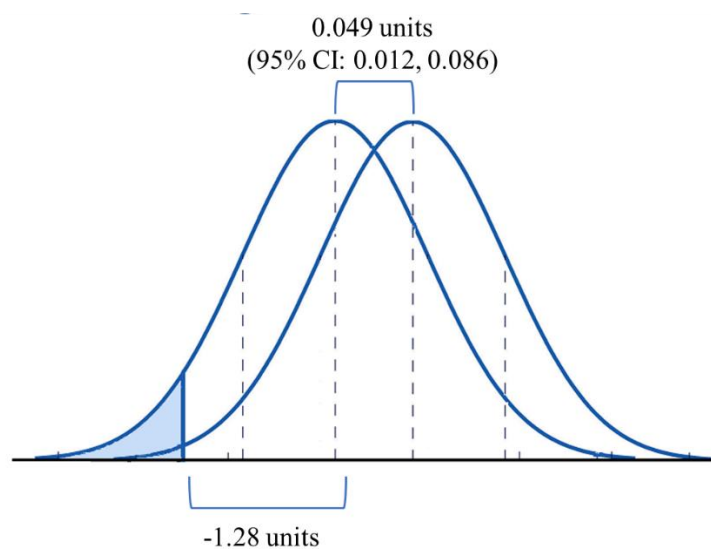

To estimate the risk of cognitive impairment in the cancer group if we applied the same threshold, we added the averaged difference of memory function between the two populations to the cut-off level in the population with no cancer diagnosis.

$$-1.28 \text{ units} - 0.049 \text{ units} = -1.33 \text{ units}$$

The risk of memory impairment in the population with 2 years history of cancer diagnosis is the area under the curve below the z-score of -1.33 which corresponds 9.2% of the population. In other words, the impairment threshold that classifies the lower 10% of the sample without cancer as “impaired” would classify only 9.2% of the sample who were diagnosed with cancer 2 years previously. This corresponds with a risk ratio for impairment of 0.92:

$$RR = \frac{\text{Risk in the cancer group}}{\text{Risk group with no cancer}} = \frac{0.092}{0.1} = 0.92$$

Using a similar calculation, if the impairment threshold cuts off 5% of the sample without cancer, it would imply a RR of approximately 0.90 associated with a cancer diagnosis 2 years previously.
